# Supplementary material for: Assessing the peatland hummock-hollow classification framework using high-resolution elevation models: Implications for appropriate complexity ecosystem modelling
Source: Copernicus journal article supplement (doi:10.5194/bg-2019-20), 2019-03-13
Supplement: Supplementary file 1 [file bg-2019-20-supplement.pdf]

1 [Figure S1]

2 Example of unsupervised classification of microtopographic elevation for the Seney, MI  
3 WET site (top panel) using *k*-means clustering (middle panel). Black, grey, and white  
4 classifications correspond with high-, intermediate-, and low elevation classifications.  
5 Microtopography was classified using three clusters based on a post hoc analysis of  
6 elevation distributions by Gaussian mixture models. The lower panel shows the  
7 distribution of height in the high- (solid), intermediate- (dot-dashed), and low- (dashed)  
8 elevation classifications. We term these microtopographic classes as high hummock, low  
9 hummock, and hollow/lawn.

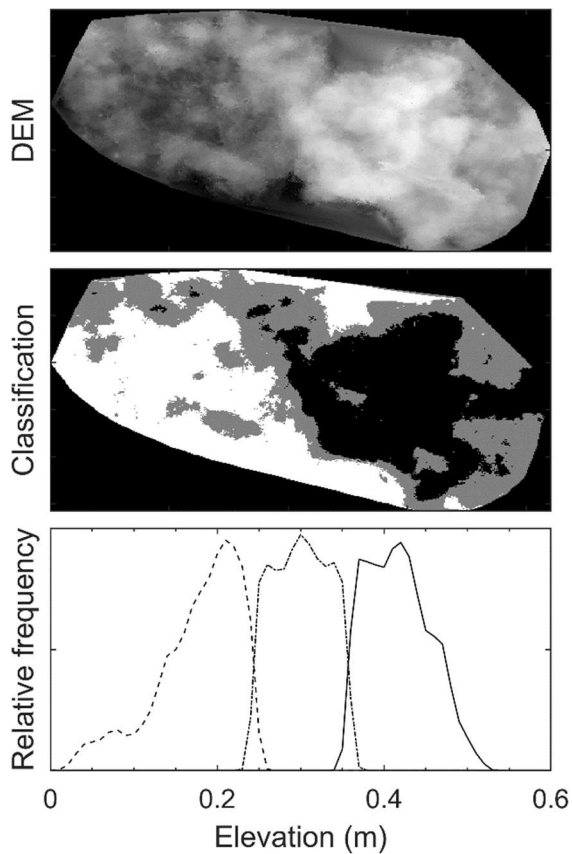

10

11

12 [Figure S2]

13 Empirical relations for normalized moss capitula net primary productivity ( $NPP_{pot}$  - % of  
14 maximum) (a), and moss water content ( $g_{water} g^{-1}_{dry\ weight}$ ) (b). Empirical relations were  
15 parameterized for high hummocks, low hummocks, and lawn/hollows using *Sphagnum*  
16 species of the section Acutifolia, *Sphagnum*, and *Cuspidata*, respectively.  $NPP_{pot}$  was  
17 parameterized using data for *Sphagnum fuscum*<sup>1</sup>, *S. papillosum*<sup>1</sup>, and *S. cuspidatum*<sup>1</sup>,  
18 respectively. Water content was parameterized using data for *Sphagnum fuscum*<sup>2</sup>, *S.*  
19 *magellanicum*<sup>2</sup>, and *S. tenellum*<sup>3</sup>, respectively.

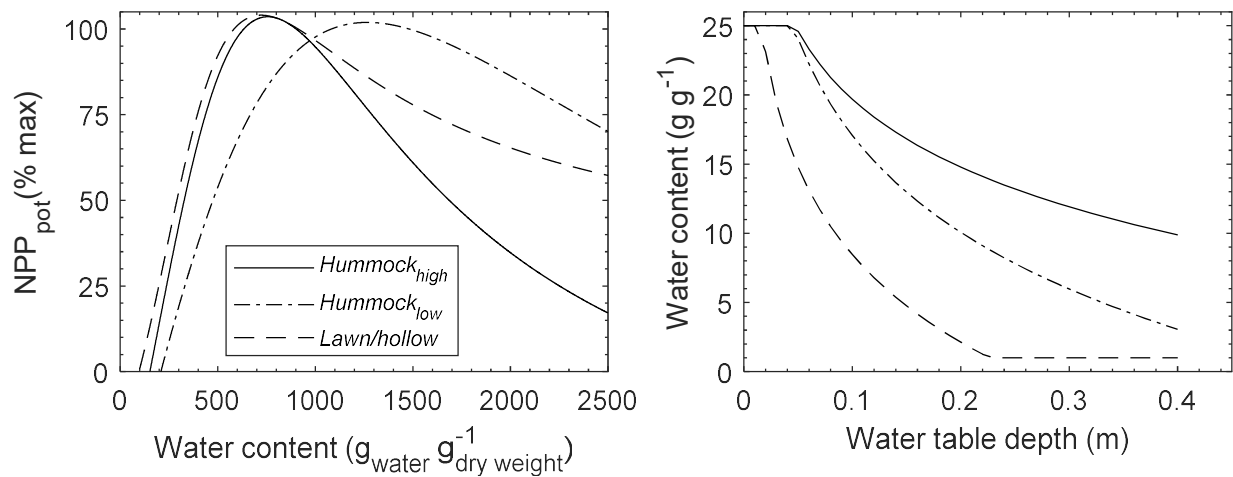

20

21 <sup>1</sup> – Schipperges, B., and Rydin, H.: Response of photosynthesis of *Sphagnum* species  
22 from contrasting microhabitats to tissue water content and repeated desiccation,  
23 New Phytologist, 140(4), 677-684, 1998.

24 <sup>2</sup> – Strack, M., and Price, J.S.: Moisture controls on carbon dioxide dynamics of peat -  
25 *Sphagnum* monoliths. Ecohydrology, 2(1), 34-41, doi: 10.1002/eco.36, 2009

26 <sup>3</sup> – Rydin, H.: Effect of water level on desiccation of *Sphagnum* in relation to  
27 surrounding Sphagna, Oikos, 45(3), 374-379, doi: 10.2307/3565573, 1985.

28

29 [Figure S3]

30 Combined relative frequency distribution of all plots (n=9) at the NOBEL, ON site (Table  
31 1) compared to the combined distribution of all Nobel, ON hummock-hollow subplots.  
32 Whole plot locations at the NOBEL, ON site where chosen randomly, with a perceived  
33 hummock-hollow microform identified around the random point. For each subplot, a  
34 location for a hummock and hollow subplot was identified in order to compare  
35 morphometric properties at spatial scales typical of chamber flux measurement compared  
36 to the microform as a whole.

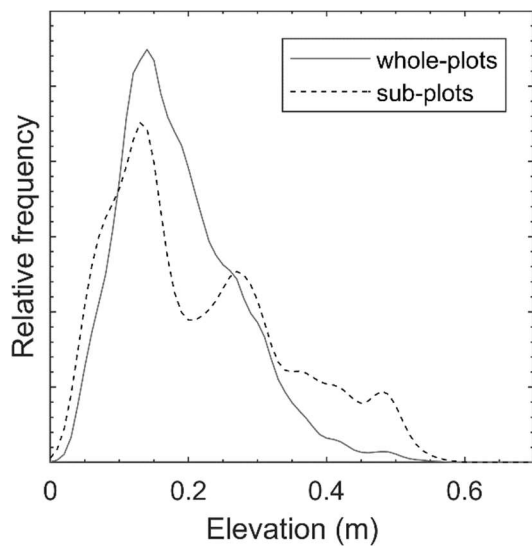

37

38

39

40 [Figure S4]

41 Frequency distribution showing goodness of fit of measured and modelled slope for two  
42 sample microtopography plots at NOBEL, ON site. Slope is derived from the surface  
43 normal of planar fit to elevation in a moving 0.03 m x 0.03 m window for the Alpha and  
44 Zeta DEM plots. A Weibull probability distribution is used to model slope distribution at  
45 the scale of interest. A Weibull distribution was chosen over other candidate models (i.e.  
46 Gamma, log-logistic, and log-normal) based on goodness of fit (AIC) across all plots  
47 (n=18).

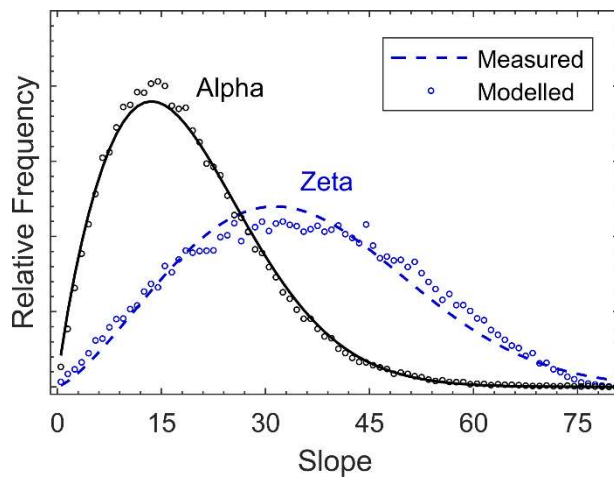

48

49

50

51 [Figure S5]

52 Comparison of modal slope from Weibull distribution fit (left panel) and frequency of steep  
53 slope (right panel). Boxplots show median (circle with dot), interquartile range (black box),  
54 and outliers (open circles) for hummock and hollow subplots as well as high-,  
55 intermediate-, and low-elevation GMM clusters.

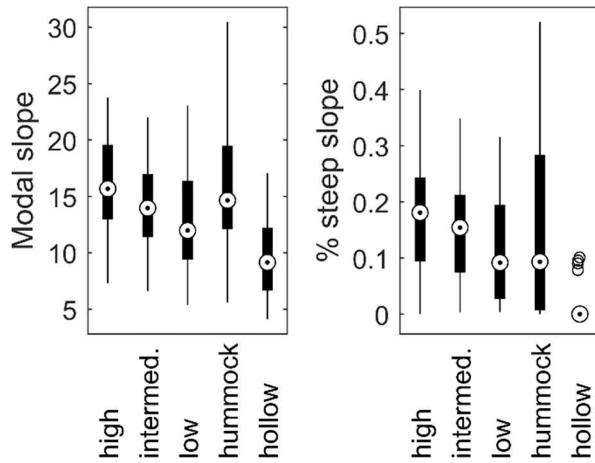

56

57

58 [Figure S6]

59 Variation in potential solar insolation relative to a flat surface based on aspect for  
60 randomly (a) and qualitatively chosen plots (b). Median of aspect-binned values are  
61 plotted.

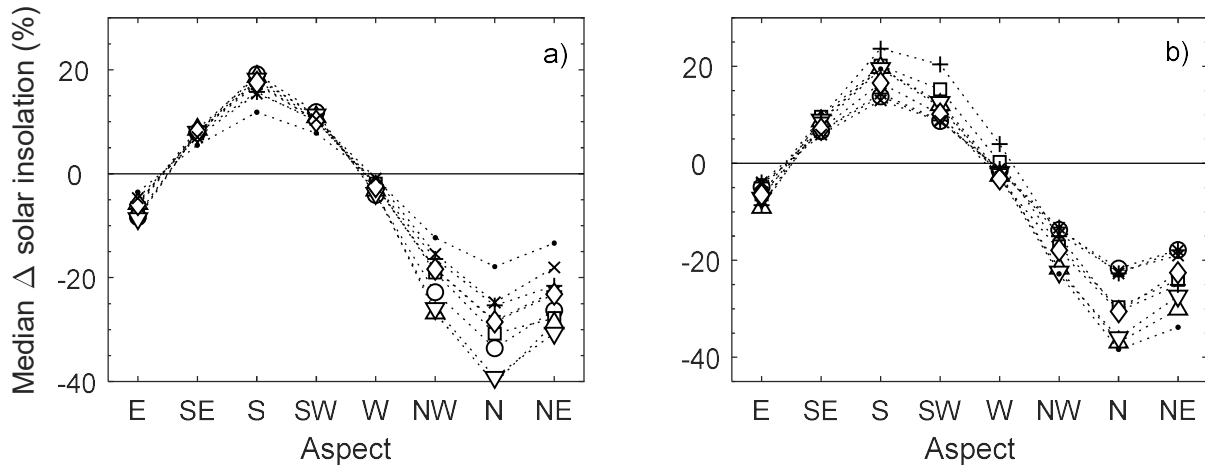

62

63

64 [Figure S7]

65 Potential net photosynthesis ( $NPP_{pot}$ ) for three microtopographic classes (e.g. see  
66 supplementary figure 1) for random (a) and qualitatively chosen (b) plots.  $NPP_{pot}$ -WC  
67 and WC-WTD relations are based on a common parameterization (see supplementary  
68 figure 2 — low hummock)

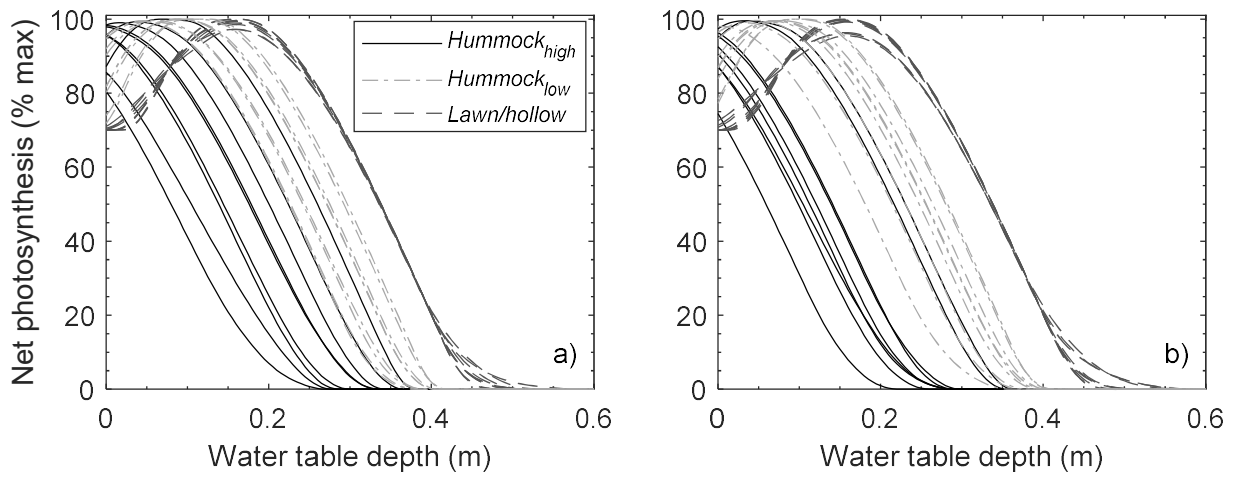

69

70

71 [Figure S8]

72 Modelled potential net photosynthesis (NPP) based on uniform parameterization  
73 (bottom row) and parameterization based on microtopographic class (middle row).  
74 Empirical relations are shown in supplementary figure S2, where the low-hummock  
75 relations are used for the uniform parameterization. Examples are modelled for three  
76 water table depths (wtd) relative to the average hollow/lawn elevation. Microtopographic  
77 parameterization is based on unsupervised k-means classification of elevation (upper  
78 left panel) with plot area classified as hollow/lawn (blue), low-hummock (black) and  
79 high-hummock (red) (upper middle panel).

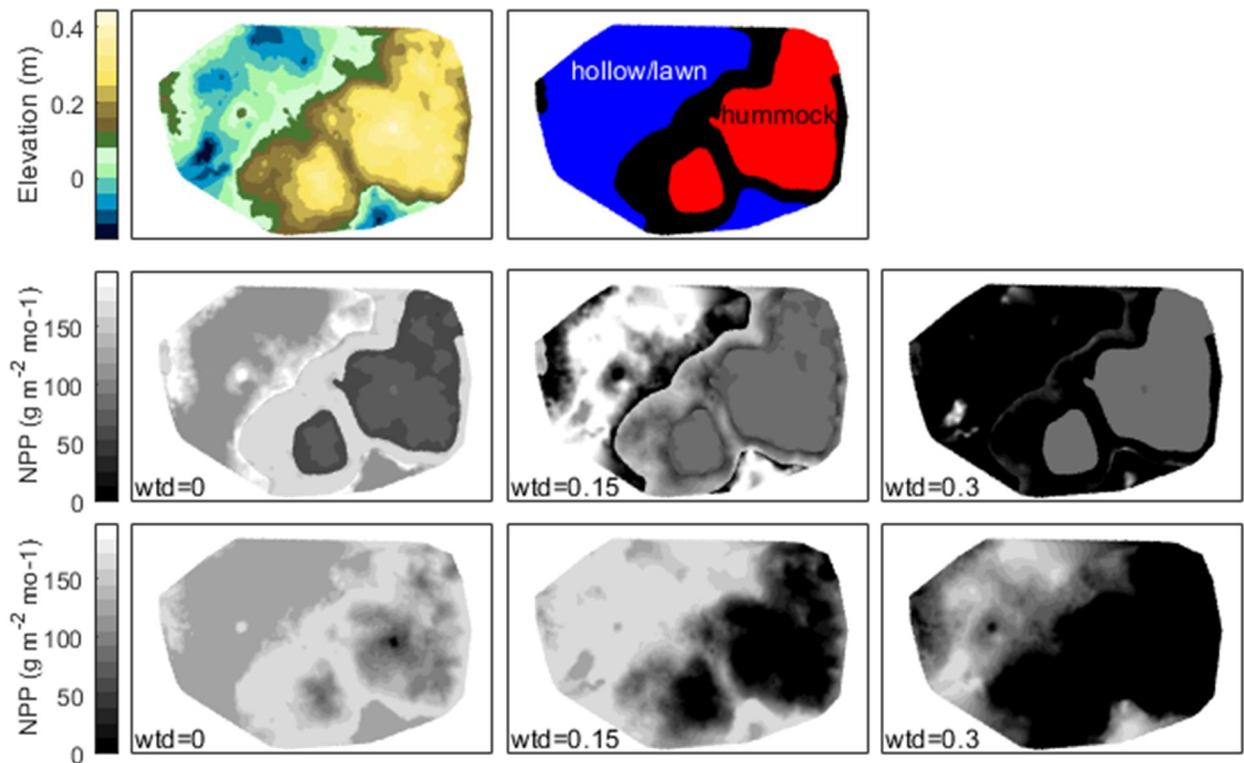

80

81
